# Supplementary material for: Transcriptional Profile of Muscle following Acute Induction of Symptoms in a Mouse Model of Kennedy's Disease/Spinobulbar Muscular Atrophy
Source: PLoS One. 2015 Feb 26;10(2):e0118120. doi: 10.1371/journal.pone.0118120 (PMC4341878; doi:10.1371/journal.pone.0118120)
Supplement: S3 Table — Genes altered in wildtype muscle following 3D or 7D testosterone treatment. For inclusion, each gene had to appear in the gene list generated by a 2 fold change, p≤0.05 criteria. Fold change values relative to untreated wildtype controls are presented, as are Genbank accession numbers, unigene symbols and names. (XLS) [file pone.0118120.s003.xls]

## Sheet: Sheet1
ID	Wt(3d)	Wt(7d)	Symbol	Gene Name
NM_021391	-1.51572	-1.43396	Alox12e	protein phosphatase 1, regulatory (inhibitor) subunit 1A
XM_358653	-1.07923	1.16473
AK009352	4.51586	2.74157	Itgb1bp3	integrin beta 1 binding protein 3
NM_009608	1.05702	1.85318	Actc1	actin, alpha, cardiac muscle 1; similar to alpha-actin (AA 27-375)
NM_026485	1.04972	1.52626	5730502D15Rik	TraB domain containing
XM_131826	-1.20581	-1.41421	Tmem52	transmembrane protein 52
XM_131166	1.26576	1.93187
NM_053200	-1.03526	-1.43396	Ces3	carboxylesterase 3
NM_144874	-1.89212	-2.36199	Cox15	COX15 homolog, cytochrome c oxidase assembly protein (yeast)
NM_013737	-1.27456	1.02101	Pla2g7	phospholipase A2, group VII (platelet-activating factor acetylhydrolase, plasma)
XM_284144	-3.55537	-2.08493	Fzd9	frizzled homolog 9 (Drosophila)
NM_029555	-1.31039	-1.30134	Gstk1	glutathione S-transferase kappa 1
NM_010859	1.34723	1.20581	Myl3	myosin, light polypeptide 3
NM_009150	-2.08493	-1.48452	Selenbp1	selenium binding protein 1; hypothetical protein LOC100044204
NM_013712	1.00696	1.18921	Itgb1bp2	integrin beta 1 binding protein 2
NM_009393	1.12506	1.23114	Tnnc1	troponin C, cardiac/slow skeletal
NM_021389	-1.04972	1.15669	Sh3kbp1	SH3-domain kinase binding protein 1
XM_193814	-1.00696	1.10957
XM_134227	2.56685	-1.06437
NM_022019	-1.20581	1.49485	Dusp10	dual specificity phosphatase 10
NM_022014	-1.26576	-1.30134	Fn3k	fructosamine 3 kinase
NM_011293	-1.15669	-1.04972	Polr2j	polymerase (RNA) II (DNA directed) polypeptide J
NM_021467	-1.3566	-1.97247	Tnni1	troponin I, skeletal, slow 1
AB44005	-1.13288	1.95884
NM_009636	1.09429	-1.24833	Aebp1	AE binding protein 1
NM_080728	-1.93187	1.11729	Myh6	myosin, heavy polypeptide 7, cardiac muscle, beta
NM_144816	-1.42405	-1.04247	Rhbdl1	rhomboid, veinlet-like 1 (Drosophila)
NM_024188	-1.03526	-1.20581	Oxct1	3-oxoacid CoA transferase 1
NM_177642	-1.05702	-2.08493	9830123M21Rik	RIKEN cDNA 9830123M21 gene
XM_132686	-1.25701	1
NM_011797	-1.11729	1.31039	Car14	carbonic anhydrase 14
NM_010801	2.54912	2.21914	Mlf1	myeloid leukemia factor 1
NM_022004	-1.56917	1.05702	Fxyd6	FXYD domain-containing ion transport regulator 6
NM_145922	-1.24833	-1.21419	Kcnc4	potassium voltage gated channel, Shaw-related subfamily, member 4
AK032039	-1.29235	-1.06437	Dnajb6	DnaJ (Hsp40) homolog, subfamily B, member 6; predicted gene 5917; predicted gene 15785; predicted gene 4852; predicted gene 2541
NM_013415	-1.06437	-1.44393	Atp1b2	ATPase, Na+/K+ transporting, beta 2 polypeptide
NM_026837	-1.44393	-1.25701	Tmem53	transmembrane protein 53
XM_127493	-1.37554	1.46409
NM_010861	-1.10957	-1.20581	Myl2	myosin, light polypeptide 2, regulatory, cardiac, slow
NM_033146	1	-1.18921	1500005A01Rik	family with sequence similarity 158, member A
NM_019414	-1.51572	-1.00696	Selenbp2	selenium binding protein 2
NM_027356	1.25701	1.84038	2700038N03Rik	UFM1-specific peptidase 1
NM_009107	4.99332	1.00696	Rxrg	retinoid X receptor gamma
NM_011303	1.07177	1.27456	Dhrs3	dehydrogenase/reductase (SDR family) member 3
NM_018832	-1.30134	1	Pdzx	MAGI family member, X-linked
NM_010274	-1.61328	-1.21419	Gpd2	glycerol phosphate dehydrogenase 2, mitochondrial
NM_029095	1.05702	-1.16473	Gup1	hedgehog acyltransferase-like
AB18021	-1.02101	1.07923
NM_178907	-1.24833	-1.30134	Mapkapk3	mitogen-activated protein kinase-activated protein kinase 3
NM_022988	2.67586	-1.08673	Nif3l1	Ngg1 interacting factor 3-like 1 (S. pombe)
NM_145562	1.61328	1.71713	9130213B05Rik	RIKEN cDNA 9130213B05 gene
AB1122	-1.42405	1.10957
NM_027093	1.21419	1.14076	2310003L22Rik	RIKEN cDNA 2310003L22 gene
NM_008420	-2.08493	1.07177	Kcnb1	potassium voltage gated channel, Shab-related subfamily, member 1
NM_016961	-1.68179	-1.16473	Mapk9	mitogen-activated protein kinase 9
NM_025909	1.24833	-1.44393	Oma1	OMA1 homolog, zinc metallopeptidase (S. cerevisiae)
XM_131633	-2.12874	1.47427
NM_008812	-1.69349	-1.02811	Padi2	peptidyl arginine deiminase, type II; similar to peptidyl arginine deiminase, type II
NM_026865	1.36604	1.08673	1700113I22Rik	alanyl-tRNA synthetase domain containing 1; RIKEN cDNA 1700113I22 gene
NM_133727	-1.34723	-1.61328	Kptn	kaptin
NM_023431	-1.44393	-3.13834	Mum1	melanoma associated antigen (mutated) 1
NM_153514	2.07053	1.32869	Rhobtb2	Rho-related BTB domain containing 2
NM_025633	-1.17283	1.75321	Metapl1	methionine aminopeptidase-like 1
NM_026580	-1.36604	-1.21419	Otub2	OTU domain, ubiquitin aldehyde binding 2
NM_023184	-2.56685	-1.11729	Klf15	Kruppel-like factor 15
NM_032396	1.03526	1.15669	Kremen1	kringle containing transmembrane protein 1
NM_183251	1.06437	-1.05702	1810020D17Rik	RIKEN cDNA 1810020D17 gene
AB24141	1.18099	-1.54756
NM_011172	1.59107	1.76541	Prodh	proline dehydrogenase
NM_027081	1.31039	1.20581	1700027J05Rik	family with sequence similarity 116, member B
AB47063	1.33793	1.07923
NM_008520	1.21419	-1.16473	Ltbp3	latent transforming growth factor beta binding protein 3
NM_145418	-1.47427	-1.39474	BC013529	cDNA sequence BC013529
NM_009179	-1.03526	1.90528	St3gal2	ST3 beta-galactoside alpha-2,3-sialyltransferase 2
NM_008409	1.12506	1.45397	Itm2a	integral membrane protein 2A
NM_198100	-1.49485	-1.05702	Tbkbp1	TBK1 binding protein 1
NM_031173	1.06437	-1.01396	Cacnb1	calcium channel, voltage-dependent, beta 1 subunit
NM_026503	2.14355	1.32869	1110058L19Rik	RIKEN cDNA 1110058L19 gene
AB47041	33.1285	2.78949
NM_010065	-1.51572	-3.78423	Dnm1	dynamin 1
AB11097	-1.10957	-1.03526
NM_020509	1.06437	-2.08493	Retnla	resistin like alpha
NM_010709	-1.14076	1.48452	Lgtn	ligatin
NM_023504	2.08493	1.40444	Nkx2-4	NK2 transcription factor related, locus 4 (Drosophila)
NM_024291	1.18921	1.29235	Ky	kyphoscoliosis peptidase
NM_028984	-1.00696	1.27456	8430406I07Rik	RIKEN cDNA 8430406I07 gene
NM_153124	1.33793	-1.13288	St8sia5	ST8 alpha-N-acetyl-neuraminide alpha-2,8-sialyltransferase 5
XM_486328	1.04247	-1.02101	6430704N06	predicted gene 4980
NM_027402	2.46229	1.51572	Fndc5	fibronectin type III domain containing 5
NM_007940	1.41421	1.04247	Ephx2	epoxide hydrolase 2, cytoplasmic
NM_009727	-2.02792	1.02101	Atp8a1	ATPase, aminophospholipid transporter (APLT), class I, type 8A, member 1
NM_023709	-1.07177	-1.61328	Capn9	calpain 9
NM_016894	1.05702	1.09429	Ramp1	receptor (calcitonin) activity modifying protein 1
NM_053119	-1.64718	-1.28343	Echs1	enoyl Coenzyme A hydratase, short chain, 1, mitochondrial
NM_175347	1.04972	1.21419	Srl	sarcalumenin
NM_009416	-1.01396	1.03526	Tpm2	tropomyosin 2, beta
NM_009722	-1.39474	-1.23971	Atp2a2	ATPase, Ca++ transporting, cardiac muscle, slow twitch 2
NM_013935	1.03526	1.05702	Ptpla	protein tyrosine phosphatase-like (proline instead of catalytic arginine), member a
NM_021515	1.04972	1.11729	Ak1	adenylate kinase 1
NM_145533	3.81055	2.54912	Smox	spermine oxidase
NM_011322	1.03526	-1.04972	Scn1b	sodium channel, voltage-gated, type I, beta
NM_024230	1.14076	-1.19748	Smtnl1	smoothelin-like 1
NM_175438	1.41421	1.10957	Aldh4a1	aldehyde dehydrogenase 4 family, member A1
XM_131300	1.19748	1.39474	2310030N02Rik	RIKEN cDNA 2310030N02 gene
NM_011638	2.88786	2.42839	Tfrc	transferrin receptor
NM_013626	-1.3566	-1.60214	Pam	peptidylglycine alpha-amidating monooxygenase
AB100271	-2.25012	1.59107	Ttn	titin
NM_026633	-1.18921	-1.26576	9530058B02Rik	RIKEN cDNA 9530058B02 gene
NM_016769	1.53688	1.41421	Smad3	MAD homolog 3 (Drosophila)
NM_053192	1.07923	-1.25701
XM_129566	-1.13288	-1.03526
XM_283635	-1.69349	1.10191	9330132E09Rik	RIKEN cDNA 9330132E09 gene
NM_007424	-1.32869	1.26576	Agc1	aggrecan
NM_011351	1.06437	1.71713	Sema6c	sema domain, transmembrane domain (TM), and cytoplasmic domain, (semaphorin) 6C
NM_178936	-1.32869	1.32869	Tmem56	transmembrane protein 56
NM_080444	1.02811	1.12506	Asb10	ankyrin repeat and SOCS box-containing 10
NM_176842	1.19748	1.41421		Tp53rk binding protein
NM_172417	2.07053	1.07177	2310042D19Rik	RIKEN cDNA 2310042D19 gene
NM_175212	1.27456	1.47427	Tmem65	transmembrane protein 65
AB5024	-1.10957	1.7411
XM_126127	-1.31039	1.17283
NM_008492	-1.26576	-1.05702	Ldhb	lactate dehydrogenase B; predicted gene 5514
NM_007755	-1.81504	1.20581	Cpeb1	cytoplasmic polyadenylation element binding protein 1
XM_194342	3.36359	1.51572
NM_025476	-1.18921	1.44393	Wwp1	family with sequence similarity 82, member B
XM_283952	-2.34567	-1.76541		expressed sequence AI464131
NM_146118	1.07177	-5.42642	Slc25a25	solute carrier family 25 (mitochondrial carrier, phosphate carrier), member 25
NM_007872	1.16473	2	Dnmt3a	DNA methyltransferase 3A
NM_011079	-1.6245	-1.17283	Phkg1	phosphorylase kinase gamma 1
NM_025840	1.01396	-1.07177	Bzw2	basic leucine zipper and W2 domains 2
NM_173011	-1.1487	-1.18921	Idh2	isocitrate dehydrogenase 2 (NADP+), mitochondrial
NM_146183	-1.31951	-1.02101	2410005H09Rik	zinc finger protein 428
NM_175523	1.00696	-1.18921		protein phosphatase 1K (PP2C domain containing)
AB12085	-1.23971	1.17283
NM_026189	-1.22264	-1.27456	2310005P05Rik	endonuclease/exonuclease/phosphatase family domain containing 1
NM_198625	-1.08673	1.09429	BC060632	metastasis suppressor 1-like; similar to CDNA sequence BC060632
XM_355650	-1.65864	-1.13288
NM_025504	-1.02101	1.10191	2310004L02Rik	ATP5S-like
NM_010197	-1.68179	-1.20581	Fgf1	fibroblast growth factor 1
NM_011838	2.11404	1.58008	Lynx1	Ly6/neurotoxin 1
NM_133927	2.82843	1.25701	Itfg2	integrin alpha FG-GAP repeat containing 2
NM_009813	-1.24833	1.02811	Casq1	calsequestrin 1
NM_011542	-1.18921	1.01396	Tcea3	transcription elongation factor A (SII), 3
AF502565	-1.51572	-1.38511	Trip10	thyroid hormone receptor interactor 10
NM_009686	1.1487	-1.27456	Apbb2	amyloid beta (A4) precursor protein-binding, family B, member 2
NM_013476	-1.00696	1.04247	Ar	androgen receptor
NM_013751	-1.20581	-1.58008	Hrasls	HRAS-like suppressor
NM_024200	2.23457	1.46409	Mfn1	mitofusin 1
AK011657	1.02101	1.13288	Sfrs3	predicted gene 7509; splicing factor, arginine/serine-rich 3 (SRp20); similar to MGC89287 protein; predicted gene 9761; predicted gene 7083
NM_144961	-1.26576	-1.55833
NM_133201	-1.07923	1.08673	Mfn2	similar to mitofusin 2; mitofusin 2
NM_133825	-1.02811	1.31951	D1Ertd622e	DNA segment, Chr 1, ERATO Doi 622, expressed
NM_134079	1.20581	-1.10957	Adk	adenosine kinase
NM_010271	1	1.07177	Gpd1	glycerol-3-phosphate dehydrogenase 1 (soluble)
NM_019874	-1.53688	1.21419	Dnajb5	DnaJ (Hsp40) homolog, subfamily B, member 5
NM_029649	1.02101	1.39474	Tmem101	transmembrane protein 101
NM_023049	1.33793	1.03526	Asb2	ankyrin repeat and SOCS box-containing 2
NM_013826	-1.51572	-1.24833	Mocs2	molybdenum cofactor synthesis 2
NM_133250	1.25701	1.28343	Mutyh	mutY homolog (E. coli)
NM_175511	1.91853	1.8025	A130092J06Rik	family with sequence similarity 78, member A; hypothetical protein LOC100047386
NM_145420	-1.39474	1.21419	Ube2d1	ubiquitin-conjugating enzyme E2D 1, UBC4/5 homolog (yeast)
XM_489213	3.16017	1.30134
NM_008097	-1.58008	-1.10191	Gcdh	glutaryl-Coenzyme A dehydrogenase
NM_133199	1.49485	1.68179	Scn4a	sodium channel, voltage-gated, type IV, alpha
NM_133485	-1.37554	1	Ppp1r14c	protein phosphatase 1, regulatory (inhibitor) subunit 14c
NM_020295	-1.04972	1.47427		limb region 1
NM_026068	1.04247	1.09429	Med31	mediator of RNA polymerase II transcription, subunit 31 homolog (yeast)
NM_010585	1.6358	-1.26576	Itpr1	inositol 1,4,5-triphosphate receptor 1
NM_011028	-1.08673	-1.22264	P2rxl1	purinergic receptor P2X, ligand-gated ion channel, 6
NM_023523	1.14076	1.31039	Pecr	peroxisomal trans-2-enoyl-CoA reductase
NM_025599	-1.40444	1.04972	2610528E23Rik	RIKEN cDNA 2610528E23 gene
NM_008107	-1.06807	1.13288	Gdf1	growth differentiation factor 1; LAG1 homolog, ceramide synthase 1
NM_011299	-1.06437	-1.14076	Rps6ka2	ribosomal protein S6 kinase, polypeptide 2; similar to Ribosomal protein S6 kinase, polypeptide 2
NM_080289	2.14355	1.31951	Grhpr	glyoxylate reductase/hydroxypyruvate reductase
NM_008487	-2.23457	-3.03143	Arhgef2	rho/rac guanine nucleotide exchange factor (GEF) 2
NM_008596	1.86607	1.27456	Sypl2	synaptophysin-like 2
NM_009385	1.04972	1.65864	Titf1	NK2 homeobox 1
NM_009781	-2.07053	-1.52626	Cacna1c	calcium channel, voltage-dependent, L type, alpha 1C subunit
NM_175031	1.79005	1.02101	Stk36	serine/threonine kinase 36 (fused homolog, Drosophila)
NM_175423	-1.45397	1.04972	D730049H07Rik	ORAI calcium release-activated calcium modulator 1
AB10087	-1.75321	1.33793
AF317223	-1.41095	-1.23685	Tpm3	predicted gene 7848; predicted gene 7839; predicted gene 4157; similar to tropomyosin 3, gamma; tropomyosin 3, gamma; predicted gene 4903
NM_008376	-2.41162	-1.30134	Gimap1	GTPase, IMAP family member 1
NM_008832	-1.36604	-1.01045	Phka1	phosphorylase kinase alpha 1
AB40146	2.92817	1.53688
NM_009613	-1.47427	-2	Adam11	a disintegrin and metallopeptidase domain 11
AK035212	1.41421	-1.52626	Sorbs1	sorbin and SH3 domain containing 1
NM_009599	2.58471	1.27456	Ache	acetylcholinesterase
NM_013871	-1.42405	-1.15669	Mapk12	mitogen-activated protein kinase 12
NM_023341	1.13288	1.34723	Cabc1	chaperone, ABC1 activity of bc1 complex like (S. pombe)
NM_027409	-1.37554	-1.48452	Mospd1	predicted gene 2147; motile sperm domain containing 1
NM_022890	1.09429	1.16473	Cldn12	claudin 12
NM_026794	1.49485	1.10957	Deb1	differentially expressed in B16F10 1
NM_199307	1.10191	1.59107	Ece1	endothelin converting enzyme 1
XM_132652	1.00696	1.65864	1700040I03Rik	RIKEN cDNA 1700040I03 gene
NM_011618	1.91853	1.21419	Tnnt1	troponin T1, skeletal, slow
NM_026172	1	1.29235	Decr1	2,4-dienoyl CoA reductase 1, mitochondrial
NM_026524	1.17283	-2.71321	Mid1ip1	Mid1 interacting protein 1 (gastrulation specific G12-like (zebrafish))
NM_146081	-1.30134	-1.31039	Ppp4r1	protein phosphatase 4, regulatory subunit 1
BC022635	1.03886	3.19319	Jph2	junctophilin 2
XM_127139	1	-1.60214	Eml1	Echinoderm microtubule associated protein like 1
XM_134169	2.67586	1.10191	Slc25a4	Solute carrier family 25 (mitochondrial carrier, adenine nucleotide translocator), member 4
BC057460	-1.84038	-1.6358	Rasa4	RAS p21 protein activator 4
NM_008623	1.29235	1.20581	Mpz	myelin protein zero
NM_025425	1.50525	1.36604	Rpl3l	ribosomal protein L3-like
NM_025421	1.3566	1.13288	Acyp1	acylphosphatase 1, erythrocyte (common) type
NM_011498	-1.23114	-1.43396	Bhlhb2	basic helix-loop-helix family, member e40
NM_134065	-1.17283	1.10957	Epdr2	ependymin related protein 1 (zebrafish)
NM_172205	-1.23971	-1.6358	Sbsn	suprabasin
NM_181588	-1.22264	1.26576	2310016A09Rik	carboxymethylenebutenolidase-like (Pseudomonas)
NM_011294	1.77769	1.53688	Sub1	similar to Activated RNA polymerase II transcriptional coactivator p15 precursor (SUB1 homolog) (Positive cofactor 4) (PC4) (p14) (Single-stranded DNA-binding protein p9); SUB1 homolog (S. cerevisiae)
NM_016978	1.09429	1.08673	Oat	ornithine aminotransferase
NM_023270	-1.39474	-1.25701	Rnf128	ring finger protein 128
NM_026808	1.21419	1.05702	1110028A07Rik	fat storage-inducing transmembrane protein 1
NM_138314	-1.25701	-1.6358	Nme7	non-metastatic cells 7, protein expressed in (nucleoside-diphosphate kinase)
NM_027126	-1.33793	1.31951	Hfe2	hemochromatosis type 2 (juvenile) (human homolog)
NM_030143	1.31039	-1.59107	Ddit4l	DNA-damage-inducible transcript 4-like
NM_030565	1.21419	1.59107	BC004044	family with sequence similarity 20, member C
XM_203453	-1.00696	1.8025
NM_145616	-1.60214	1.14076	Lrrc49	leucine rich repeat containing 49
NM_024226	-1.13288	2.64818	Rtn4	reticulon 4
AB29055	1.18099	1.85318
NM_010473	1.04247	1.03526	Hrc	histidine rich calcium binding protein
NM_016872	1.45397	1.04972	Vamp5	vesicle-associated membrane protein 5
NM_133183	1.27456	1.18099		calcium channel, voltage-dependent, gamma subunit 6
NM_023395	-1.47427	-1.02101	Wfdc1	WAP four-disulfide core domain 1
NM_007606	-1.19748	1.01396	Car3	carbonic anhydrase 3
NM_144941	-1.07923	1.31039	Rprc1	microtubule-associated protein 7 domain containing 1
NM_011189	1.05702	-1.13288	Psme1	predicted gene 7776; proteasome (prosome, macropain) 28 subunit, alpha
NM_177603	1.16473	-1.09429	Frat2	frequently rearranged in advanced T-cell lymphomas 2
NM_008830	1.12506	-1.19748	Abcb4	ATP-binding cassette, sub-family B (MDR/TAP), member 4
NM_009943	1.28343	-1.00696	Cox6a2	cytochrome c oxidase, subunit VI a, polypeptide 2
NM_025710	1.20581	1.64718	Uqcrfs1	ubiquinol-cytochrome c reductase, Rieske iron-sulfur polypeptide 1
NM_144801	-1.23114	1.22264	2310076O21Rik	transmembrane protein 143
AB19144	-1.08673	1.18099
AB47125	-1.53688	-1.12506
NM_012029	1.04972	-1.27456	Zfp653	ECSIT homolog (Drosophila)
NM_028390	1.64718	1.65864	Anln	anillin, actin binding protein
NM_153744	-1.20581	1.01396	Prkag3	protein kinase, AMP-activated, gamma 3 non-catatlytic subunit
NM_008063	1.76541	1.23114	Slc37a4	solute carrier family 37 (glucose-6-phosphate transporter), member 4
NM_146188	1.54756	1.34723	Kctd15	potassium channel tetramerisation domain containing 15
NM_176840	1.13288	-1.04972	Osbpl11	oxysterol binding protein-like 11
NM_008468	-1.30134	-1.03526	Kpna6	karyopherin (importin) alpha 6
NM_017379	-1.04972	-1.14076	Tuba8	tubulin, alpha 8
NM_023644	1.86607	1.04972	Mccc1	methylcrotonoyl-Coenzyme A carboxylase 1 (alpha)
NM_145521	1.07177	1.01396	Ppapdc3	phosphatidic acid phosphatase type 2 domain containing 3
NM_146010	-1.14076	1.21419	Tspan8	tetraspanin 8
AB9053	1.47427	1.48452
NM_021329	-2.14355	-1.34723	2400006H24Rik	predicted gene 7791; similar to Ran-interacting protein MOG1; predicted gene 15711; RAN guanine nucleotide release factor; predicted gene 4535; predicted gene 8572
NM_144844	1.91853	-1.41421	Pcca	propionyl-Coenzyme A carboxylase, alpha polypeptide
AB1046	-1.23114	-3.36359
NM_023229	-1.14076	1.54756	Fastk	Fas-activated serine/threonine kinase
NM_053078	1.17283	1.77769	D0H4S114	DNA segment, human D4S114
NM_133778	1.58008	1.31039	2900046G09Rik	family with sequence similarity 131, member A
XM_126635	-1.44393	-1.41421	Dysfip1	Dysferlin interacting protein 1
NM_009721	-1.21419	1.03526	Atp1b1	ATPase, Na+/K+ transporting, beta 1 polypeptide
NM_019547	-1.3566	-1.26576	Rnpc1	RNA binding motif protein 38
NM_026159	1.15669	-1.01396	0610039N19Rik	retinol saturase (all trans retinol 13,14 reductase)
XM_358335	-1.22264	1.22264
AB29109	-1.93187	-1.95884
AB43134	-1.23114	1.13288
NM_013899	3.65533	1.53688	Timm10	translocase of inner mitochondrial membrane 10 homolog (yeast)
NM_009520	2.53151	-1.15669	Wnt2b	wingless related MMTV integration site 2b
NM_130881	1.65864	1.43396	Pabpc4	similar to Poly A binding protein, cytoplasmic 4; poly(A) binding protein, cytoplasmic 4; predicted gene 12623; predicted gene 5088; hypothetical protein LOC100044219
NM_138315	1.1487	1.7411	Mical1	microtubule associated monoxygenase, calponin and LIM domain containing 1
NM_177041	-1.29235	-1.26576	Flad1	RFad1, flavin adenine dinucleotide synthetase, homolog (yeast)
XM_125524	-1.23114	1.93187
NM_010231	1.25701	2.60268	Fmo1	flavin containing monooxygenase 1
NM_027275	1.16473	1.04247	2810422B04Rik	pentatricopeptide repeat domain 3
AB10071	1.7411	1.46409
NM_008640	1.6358	1.79005	Laptm4a	lysosomal-associated protein transmembrane 4A
NM_153049	1.75321	1.16473	Mkl1	MKL (megakaryoblastic leukemia)/myocardin-like 1
NM_009328	1.06437	1.58008	Tcf15	transcription factor 15
NM_009505	1.19748	-1.29235	Vegfa	vascular endothelial growth factor A
NM_008862	-1.50525	1.00696	Pkia	protein kinase inhibitor, alpha
AB28082	1.02101	1.00696
AB40015	1.01396	-1.41421
NM_013723	-1.01396	1.31951	Podxl	podocalyxin-like
NM_023844	-1.15669	1.21419	Jam2	junction adhesion molecule 2
AB30122	-1.7411	1.02101
NM_025275	-1.06437	1.06437	X83328	archaelysin family metallopeptidase 2
NM_145834	-1.86607	1.45397	Il17c	interleukin 17C
NM_008218	-1.70527	-2.05623	Hba-a1	hemoglobin alpha, adult chain 2; hemoglobin alpha, adult chain 1
NM_009868	1.12506	1.20581	Cdh5	cadherin 5
NM_173752	-1.00696	-1.23971	1110067D22Rik	RIKEN cDNA 1110067D22 gene
NM_013645	1.26576	1.6245	Pvalb	parvalbumin
NM_009656	1.24833	-1.04972	Aldh2	aldehyde dehydrogenase 2, mitochondrial
NM_133348	1.02101	-1.04247	Acot7	acyl-CoA thioesterase 7
XM_284750	1.02101	-1.49485
NM_026131	-1.07923	-1.02811	Pdlim7	PDZ and LIM domain 7
AB30119	-1.13288	1.18921
NM_019671	1.06437	-1.53688	Net1	predicted gene 8990; neuroepithelial cell transforming gene 1
NM_178696	1.01396	-1.48452	B430110G05Rik	solute carrier family 25, member 44
XM_130322	-1.97247	1.27456
NM_008059	2.31338	1.50525	G0s2	G0/G1 switch gene 2
NM_016686	1.00696	-1.18099	Vezf1	vascular endothelial zinc finger 1
NM_153516	-1.22264	-1.45397	Bcl2l13	BCL2-like 13 (apoptosis facilitator)
NM_174847	1.00696	1.17283	5830404H04Rik	RIKEN cDNA 5830404H04 gene
NM_007994	-1.20581	-1.02811	Fbp2	fructose bisphosphatase 2
NM_013870	1.87905	1.03526	Smtn	smoothelin
NM_009694	-1.09429	-1.30134	Apobec2	apolipoprotein B mRNA editing enzyme, catalytic polypeptide 2; similar to APOBEC-2 protein
NM_013456	-1.02811	1.00696	Actn3	actinin alpha 3
NM_008509	-1.00696	1.01396		lipoprotein lipase; similar to Lipoprotein lipase precursor (LPL)
NM_009814	1.02811	1.53688	Casq2	calsequestrin 2
NM_024480	1.09429	-1.27456	Sh3bp5l	SH3 binding domain protein 5 like
NM_018870	1.22264	1.27456	Pgam2	phosphoglycerate mutase 2
XM_484487	1.23114	1.27456		apolipoprotein L 6
NM_011571	-1.07923	1.1487	Tesk1	testis specific protein kinase 1
NM_144823	-1.45397	-1.11729	Acsl6	acyl-CoA synthetase long-chain family member 6
NM_144870	1.6358	-1.04972	Ndufs8	NADH dehydrogenase (ubiquinone) Fe-S protein 8
NM_027326	-1.23542	-1.07177	Mllt3	myeloid/lymphoid or mixed-lineage leukemia (trithorax homolog, Drosophila); translocated to, 3
NM_008057	1.68179	1.31951	Fzd7	frizzled homolog 7 (Drosophila)
NM_027815	-1.07177	1.45397	9030624J02Rik	RIKEN cDNA 9030624J02 gene
NM_011548	1.03526	1.03526	Tcfe2a	transcription factor E2a
NM_183188	1.10191	1.03526		ataxin 2 binding protein 1
NM_178149	-1.37554	1.50525	Limk2	phosphoinositide-3-kinase interacting protein 1
NM_007531	-1.07177	-1.37554	Phb2	prohibitin 2
AB44152	-2.47942	4
NM_009003	2.05623	-2	Rab4a	RAB4A, member RAS oncogene family
U21209	-1.04972	-1.61328	Clk1	CDC-like kinase 1
NM_026384	-1.18921	1.16473	Dgat2	diacylglycerol O-acyltransferase 2
NM_016749	-4.82323	-1.22264	Mybph	myosin binding protein H
NM_138741	1.01396	1.29235	Sdpr	serum deprivation response
NM_153526	1.45397	-2.60268	Insig1	insulin induced gene 1
NM_198013	-2	1.76541	Cuedc1	CUE domain containing 1
AB6063	-1.76541	-1.18099
NM_021285	-1.36604	1.15669	Myl1	myosin, light polypeptide 1
NM_138628	1.14076	-1.01396	Txlnb	taxilin beta
AK087855	-1.50525	1.68179	Agl	amylo-1,6-glucosidase, 4-alpha-glucanotransferase
NM_011615	-1.31039	1.59107	Dedd	death effector domain-containing
NM_020027	1.84038	1.7411	Bat2	HLA-B associated transcript 2
NM_025546	-1.08673	1.22264	Rsl1d1	ribosomal L1 domain containing 1
NM_011802	-1.47427	1.04247	Clpx	caseinolytic peptidase X (E.coli)
NM_019793	-1.07923	-1.12506	Tspan3	tetraspanin 3
XM_128725	-1.46409	1.32869	Ndufv2	NADH dehydrogenase (ubiquinone) flavoprotein 2
NM_011844	1.28343	-1.04247	Mgll	monoglyceride lipase
NM_026731	-2.18859	-2.09943	Ppp1r14a	protein phosphatase 1, regulatory (inhibitor) subunit 14A
NM_198415	1.00696	-1.00696	Ckmt2	creatine kinase, mitochondrial 2
NM_023166	1.39474	-1.04247	Mtvr2	mammary tumor virus receptor 2
NM_029044	-1.23114	1.21419	Lrrc48	leucine rich repeat containing 48
NM_008220	1.09809	-1.73508	Hbb-b1	hemoglobin, beta adult major chain; hemoglobin, beta adult minor chain
NM_009419	-1.03526	-1.45397	Tpst2	protein-tyrosine sulfotransferase 2
NM_011792	1.71713	2.47942	Bace1	beta-site APP cleaving enzyme 1
NM_026252	1.46409	-1.71713	Cpeb4	cytoplasmic polyadenylation element binding protein 4
NM_146216	1.25701	1.20581	Vac14	Vac14 homolog (S. cerevisiae)
NM_153578	-1.94531	1.20581	Nipa1	non imprinted in Prader-Willi/Angelman syndrome 1 homolog (human)
AB23085	1.51572	-1.54756
XM_485971	1.22264	-1.45397
NM_133693	1.45397	-1.18921	3100004P22Rik	RNA binding motif protein 42
NM_172259	-1.43396	-1.64718	BC037527	myosin, light polypeptide 6B
NM_179203	1.70527	1.44393	Atad3a	ATPase family, AAA domain containing 3A
AB16107	1.37554	1.06437
NM_153168	-1.54756	1.28343		leucyl-tRNA synthetase, mitochondrial
NM_024201	1.00696	1.27456		coiled-coil domain containing 127
NM_028444	-1.07923	1.26576	Prkcdbp	protein kinase C, delta binding protein
AB38092	-1.6245	-1.29235
AK033977	-1.08673	1.23114	Syt11	Synaptotagmin XI
NM_016797	1.00696	1.00696	Stx7	syntaxin 7
NM_026939	1.77769	-1.18921		RIKEN cDNA 1810009N02 gene
NM_025289	1.02811	-1.11729	Tbrg1	transforming growth factor beta regulated gene 1
NM_009464	1.43396	1.21419	Ucp3	uncoupling protein 3 (mitochondrial, proton carrier)
XM_127051	1.45397	1.34723	Sos2	son of sevenless homolog 2 (Drosophila)
NM_008149	-1.90528	1.20581	Gpam	glycerol-3-phosphate acyltransferase, mitochondrial
XM_355486	-1.14076	-1.6245
BC056990	-1.82766	1.13288	Gabbr1	gamma-aminobutyric acid (GABA) B receptor, 1
NM_022980	-1.29235	-1.31039	Dscr1l2	regulator of calcineurin 3
NM_010027	-1.04247	-1.10957	Ddt	D-dopachrome tautomerase
NM_028777	-1.06437	-1.18921	Sec14l1	SEC14-like 1 (S. cerevisiae)
NM_013805	1.24833	1.31039	Cldn5	claudin 5
AB16004	1.70527	2.08493
AB16096	-1.15669	-1.17283
NM_054099	-1.18921	-1.31951	1110038F14Rik	RIKEN cDNA 1110038F14 gene
NM_008989	2.04202	-1.09429	Pura	similar to hCG45299; purine rich element binding protein A
NM_009176	-1.00696	1.85318	St3gal3	ST3 beta-galactoside alpha-2,3-sialyltransferase 3
NM_145988	-1.56917	-1.18099
NM_170592	2.01391	1.47427	2610205E22Rik	methyltransferase like 11A
AB19135	-1.23971	-1.13288
NM_145438	1.10191	-1.72907	Llglh2	lethal giant larvae homolog 2 (Drosophila)
AB3099	-1.42405	-1.15669
AB29018	-1.56917	-1.61328
XM_127602	-1.48452	1.28343	Zmynd17	zinc finger, MYND domain containing 17
AB17119	-1.76541	-1.32869
AB42126	-1.26576	2.09943
NM_011256	1.14076	1.90528	Pitpnm2	phosphatidylinositol transfer protein, membrane-associated 2
XM_126658	2.69447	1.17283
NM_133970	1.10957	-1.52626	D8Ertd354e	DNA segment, Chr 8, ERATO Doi 354, expressed
NM_011666	-1.16473	-1.09429	Ube1c	ubiquitin-like modifier activating enzyme 3
NM_009233	-1.28343	1.3566	Sox1	SRY-box containing gene 1
NM_026856	1.07923	1.26576	Zfp644	zinc finger protein 644
NM_021354	-1.56917	-1.14076	Drg2	hypothetical protein LOC674305; predicted gene 8918; developmentally regulated GTP binding protein 2
NM_024499	1.03526	-1.15669	Sgta	small glutamine-rich tetratricopeptide repeat (TPR)-containing, alpha
NM_017368	1.95884	2.26577	Cugbp1	CUG triplet repeat, RNA binding protein 1
XM_126928	1	-1.60214
AB33027	-1.90528	-2.17347
NM_027088	1.6245	1.22264	Bap1	Brca1 associated protein 1
AB43006	-1.07923	-1.44393
NM_080639	2.37841	1.26576	Timp4	tissue inhibitor of metalloproteinase 4
AK019476	1.24833	-1.26576	Smpd3	sphingomyelin phosphodiesterase 3, neutral
NM_133801	-1.07177	1.10191	Gtf2f1	general transcription factor IIF, polypeptide 1
AB41137	-1.87905	3.34035
NM_008530	-1.18099	1.26576	Ly6f	lymphocyte antigen 6 complex, locus F
NM_010726	1.04972	1.13288	Phyh	phytanoyl-CoA hydroxylase
NM_011122	-1.05702	-1.25701	Plod1	procollagen-lysine, 2-oxoglutarate 5-dioxygenase 1
AB24152	1.03526	-1.06437
NM_026346	-2.08493	-1.02101	Fbxo32	F-box protein 32
NM_198671	1.56917	1.28343	Gse1	genetic suppressor element 1
AB44148	-2.46229	2.56685
NM_007394	1.21419	1.10191	Acvr1	activin A receptor, type 1
NM_019946	-1.82766	-1.33793	Mgst1	microsomal glutathione S-transferase 1
NM_144843	-1.23114	1.01396	Mtmr6	myotubularin related protein 6
AK033455	-1.29235	-1.31039	9030208C03Rik	RIKEN cDNA 9030208C03 gene
NM_019729	1.11729	-1.18921	Usp8	ubiquitin specific peptidase 8
NM_022997	1.07923	1.60214	Vps35	vacuolar protein sorting 35
NM_138744	-1.52626	1.02811	Ssx2ip	synovial sarcoma, X breakpoint 2 interacting protein
NM_013492	-1.28343	-1.53688	Clu	similar to clusterin; clusterin
NM_025514	-1.19748	-1.00696	D10Ertd641e	DNA segment, Chr 10, ERATO Doi 641, expressed
NM_018856	-1.07923	1.1487
NM_172566	1.19748	-1.87905	Rundc1	RUN domain containing 1
NM_153547	1.10957	-1.47427	Gnl3	guanine nucleotide binding protein-like 3 (nucleolar)
NM_020568	1.59107	-1.38511	S3-12	plasma membrane associated protein, S3-12
AK088505	-1.02101	1.19748	Ogt	O-linked N-acetylglucosamine (GlcNAc) transferase (UDP-N-acetylglucosamine:polypeptide-N-acetylglucosaminyl transferase)
AK122445	-1.87905	-1.40444	Tbc1d1	TBC1 domain family, member 1; similar to TBC1 domain family member 1
NM_023247	-1.31039	1.23971	4733401H18Rik	NADH dehydrogenase (ubiquinone) 1 alpha subcomplex, assembly factor 3
NM_026550	-1.34723	1.1487	Pak1ip1	PAK1 interacting protein 1
NM_145470	1.8025	-1.29235	Depdc6	DEP domain containing 6
AB41135	-1.97247	3.07375
NM_007763	-1.30134	-1.15669	Crip1	cysteine-rich protein 1 (intestinal)
NM_013610	1.36604	1.64718	Ninj1	ninjurin 1
XM_128981	1.45397	1.39474
NM_010658	1.91853	1.51572	Mafb	v-maf musculoaponeurotic fibrosarcoma oncogene family, protein B (avian)
NM_144811	1.14076	1.41421	Apobec3	chromobox homolog 7
NM_183408	-2.08493	1.02811	Pde4a	phosphodiesterase 4A, cAMP specific
NM_009601	1.3566	1.15669	Chrnb1	cholinergic receptor, nicotinic, beta polypeptide 1 (muscle)
NM_011969	-1.10191	-1.50525	Psma7	proteasome (prosome, macropain) subunit, alpha type 7
NM_024260	-1.20581	-1.28343	1700034M03Rik	coiled-coil domain containing 132
AB16068	-1.51572	1.20581
AB42128	-2.01391	2.44528
AK011992	3.45815	1.07923	Atp5a1	thymopoietin
NM_010081	-1.86607	-1.38511	Dst	Dystonin
NM_011790	1.72907	1.07923	Arih2	ariadne homolog 2 (Drosophila); predicted gene 12263
XM_126512	-1.39474	-1.26576
NM_020266	-1.11729	-1.04972	Dnajb10	DnaJ (Hsp40) homolog, subfamily B, member 2
NM_194070	1.51572	1.40444
AB41133	-2.9897	4.16986
NM_010578	-1.46409	-1.04247	Itgb1	integrin beta 1 (fibronectin receptor beta)
NM_144873	-1.38511	-1.70527	Uhrf2	ubiquitin-like, containing PHD and RING finger domains 2
NM_016843	-1.17283	1.04972	Atxn10	ataxin 10
NM_007417	1.07177	-1.05702	Adra2a	adrenergic receptor, alpha 2a
AB42130	1.17283	3.07375
NM_023733	-1.67018	-1.98618	Crot	carnitine O-octanoyltransferase
NM_029640	1.26576	-1.25701	1810044A24Rik	trafficking protein particle complex 9
NM_010834	1.07923	-1.16473	Gdf8	myostatin
NM_080443	-1.85318	-2.51403	Asb7	ankyrin repeat and SOCS box-containing 7
NM_011057	-1.6245	-1.29235	Pdgfb	similar to platelet-derived growth factor B chain; platelet derived growth factor, B polypeptide
XM_125779	1.02811	1.06437	Shc2	Src homology 2 domain-containing transforming protein C2
NM_010518	-1.09429	1.28343	Igfbp5	insulin-like growth factor binding protein 5
NM_020009	-1.54756	1.02811	Frap1	mechanistic target of rapamycin (serine/threonine kinase)
NM_009653	-1.42405	-2.39496	Alas2	aminolevulinic acid synthase 2, erythroid
NM_009778	1.38511	-1.03526	C3	complement component 3; similar to complement component C3 prepropeptide, last
NM_033623	-1.61328	-1.03526	Dcun1d1	similar to RP42; DCN1, defective in cullin neddylation 1, domain containing 1 (S. cerevisiae)
NM_011552	-1.15669	1.11729	Tcof1	Treacher Collins Franceschetti syndrome 1, homolog
NM_019661	2.80889	1.6245	0610042I15Rik	YKT6 homolog (S. Cerevisiae)
NM_178185	1.02811	-1.26576	Hist1h2ao	histone cluster 1, H2ad; histone cluster 1, H2ae; histone cluster 1, H2ag; histone cluster 1, H2ah; histone cluster 1, H2ai; similar to histone 2a; histone cluster 1, H2an; histone cluster 1, H2ao; histone cluster 1, H2ac; histone cluster 1, H2ab
NM_010516	1.02811	1.04972	Cyr61	cysteine rich protein 61
NM_025426	1.32869	-1.37554	Crsp9	mediator complex subunit 7
AB44120	-1.05702	1.13288
NM_019800	1.49485	1.31951	Acp6	acid phosphatase 6, lysophosphatidic
NM_138604	1.54756	1.6245	Otud5	OTU domain containing 5
BC006955	1.02811	-1.31039	H2afy	H2A histone family, member Y
NM_007918	1.44393	-1.18921	Eif4ebp1	eukaryotic translation initiation factor 4E binding protein 1
NM_020577	1.10191	1.08673	As3mt	arsenic (+3 oxidation state) methyltransferase
NM_133971	1.11729	1.29235	Ankrd10	ankyrin repeat domain 10
AB43135	-3.05252	3.27161
AF108718	1.71713	1.52626	Camk2b	calcium/calmodulin-dependent protein kinase II, beta
NM_007542	1.6245	1.82766	Bgn	biglycan
NC_001702	1.60214	1.6245
NM_008951	1.64718	1.00696	Psmd4	proteasome (prosome, macropain) 26S subunit, non-ATPase, 4
NM_010217	2.54912	2.63902	Ctgf	connective tissue growth factor
NM_030165	-1.38511	-1.07923	Galnact2	chondroitin sulfate N-acetylgalactosaminyltransferase 2
NM_030178	-1.7411	1.04247	Brpf1	bromodomain and PHD finger containing, 1
NM_201394	-3.22657	1.02101		plectin 1
AB10116	1.8025	1.49485
NM_173019	1.04247	-1.16473	Pfkfb4	6-phosphofructo-2-kinase/fructose-2,6-biphosphatase 4
NM_009883	-1.33793	-1.18921	Cebpb	CCAAT/enhancer binding protein (C/EBP), beta
NM_028007	-1.16473	-1.72907	Itfg1	integrin alpha FG-GAP repeat containing 1
NM_007791	7.83536	2.86791	Csrp1	cysteine and glycine-rich protein 1
NM_009349	-1.22264	1.01396	Inmt	indolethylamine N-methyltransferase
NM_020043	-1.09429	1.29235	Nope	immunoglobulin superfamily, DCC subclass, member 4
AK031357	-1.31039	1.3566	Cnot1	predicted gene 6158; CCR4-NOT transcription complex, subunit 1
NM_016985	1.45397	-1.00696	Mtmr1	myotubularin related protein 1
NM_026432	-1.32869	-1.75321	Tmem66	transmembrane protein 66
NM_133901	1.33793	1.38511
NM_177919	1.31951	1.97247	Tceal5	transcription elongation factor A (SII)-like 5
NM_001004365	-1.21419	-2.8481	Actr3b	ARP3 actin-related protein 3 homolog B (yeast)
NM_009674	2.90795	1.84038	Anxa7	annexin A7
NM_011046	1.12506	-1.11729	Furin	furin (paired basic amino acid cleaving enzyme)
NM_011817	2.41162	1.44393	Gadd45g	growth arrest and DNA-damage-inducible 45 gamma
NM_025880	1.18099	-1.19748	2410002F23Rik	RIKEN cDNA 2410002F23 gene
NM_017370	9.98664	1	Hp	haptoglobin
NM_028791	1.40444	1	1300018I05Rik	RIKEN cDNA 1300018I05 gene; ring finger protein 8
NM_025291	2.46229	1.50525	Sra1	steroid receptor RNA activator 1
NM_033560	1.43396	1.39474	Vps37a	vacuolar protein sorting 37A (yeast); similar to Vps37a protein
NM_011431	1.22264	-1.32869	Eftud2	elongation factor Tu GTP binding domain containing 2
NM_181403	1.47427	1.15669	Vps37c	vacuolar protein sorting 37C (yeast)
NM_008473	-1.07177	1.04247	Krt2-1	keratin 1
XM_110248	-1.21419	-2.39496
NM_145830	1.00696	-1.18921	Ehmt2	euchromatic histone lysine N-methyltransferase 2
NM_207652	-1.39474	1.29235	Tsc22d1	TSC22 domain family, member 1
AB35138	1.40444	1.3566
XM_130232	-3.05252	2.49666	Neb	nebulin
XM_283972	1.05702	1.20581	1700065A05Rik	RIKEN cDNA 1700065A05 gene
AB14102	1.10957	1.04972
NM_009113	1.18099	-1.31951	S100a13	S100 calcium binding protein A13
NM_134054	1.93187	1.45397	1110002B05Rik	RIKEN cDNA 1110002B05 gene
NM_145926	1.42405	-1.27456	Mgat4b	mannoside acetylglucosaminyltransferase 4, isoenzyme B
NM_175357	-1.23971	-1.00696	Crbn	cereblon
NM_181404	-1.31951	-1.07923	Ankrd15	KN motif and ankyrin repeat domains 1
XM_129928	1.1487	-1.27456
NM_011767	-1.32869	1.6358	Zfr	zinc finger RNA binding protein
NM_013676	1.34723	-1.29235	Supt5h	suppressor of Ty 5 homolog (S. cerevisiae)
NM_174852	1.59107	1.65864	Phf12	PHD finger protein 12
NM_019755	1.15669	-1.13288	Plp2	proteolipid protein 2; predicted gene 13669
NM_170755	1.18921	-1.69349	BC038286	family with sequence similarity 134, member A
AB30044	1.18099	-1.43396
NM_177725	2.23457	1.3566	Lrrc8a	leucine rich repeat containing 8A
XM_484044	2.18859	1.75321
XM_485125	1.34723	2.23457	LOC627905	Similar to gonadotropin inducible ovarian transcription factor 1
Y08640	-2.01391	1.04972	Rora	RAR-related orphan receptor alpha
AB37088	-1.05702	1.20581
AB3031	1.31039	1.47427
NM_138673	1.02811	-5.65685	Stab2	similar to FEX2; stabilin 2
NM_146042	1.39474	-1.16473	Ibrdc2	ring finger protein 144B
NM_010866	-2.53151	-1.18099	Myod1	myogenic differentiation 1
NM_025788	1.54756	1.17283	Btbd14b	nucleus accumbens associated 1, BEN and BTB (POZ) domain containing
AB42093	1.6358	-1.26576
NM_145135	1.14076	1.24833	Rnh1	ribonuclease/angiogenin inhibitor 1
NM_001001320	2.41162	-1.02811	Tbx10	T-box 10
XM_132983	1.34723	-1.13288
NM_030260	-1.45397	-1.17283	Zxdc	ZXD family zinc finger C
NM_133662	-1.59107	-1.43396	Ier3	immediate early response 3
NM_007705	1.68179	1.04972	Cirbp	cold inducible RNA binding protein
NM_030598	3.16017	1.7411	Dscr1l1	regulator of calcineurin 2
NM_054097	1.32869	2.36199	Pip5k2c	phosphatidylinositol-5-phosphate 4-kinase, type II, gamma
NM_145925	1.23971	-1.29235	Pttg1ip	pituitary tumor-transforming 1 interacting protein
NM_172649	1.39474	-1.18099
XM_130033	-1.44393	-1.54756	Arhgap21	Rho GTPase activating protein 21
NM_175540	2.01391	1.87905	Eda2r	ectodysplasin A2 isoform receptor
NM_026390	-1.13288	1.1487		UBX domain protein 4
NM_026487	1.40444	1.10191	Atad1	ATPase family, AAA domain containing 1
NM_029796	1.17283	1.32869	Lrg1	leucine-rich alpha-2-glycoprotein 1
NM_030258	2.2974	1.41421	Gpr146	G protein-coupled receptor 146
NM_133919	2.09943	1.45397	Aff1	AF4/FMR2 family, member 1
AK028479	-1.02811	-1.33793	Pvrl4	poliovirus receptor-related 4
NM_009104	-1.65864	1	Rrm2	ribonucleotide reductase M2
NM_009964	-1.02101	1.01396	Cryab	crystallin, alpha B
NM_010119	1.76541	1.11729	Ehd1	EH-domain containing 1
NM_033474	1.04972	-1.72907		armadillo repeat gene deleted in velo-cardio-facial syndrome
NM_009208	1.33793	1.01396	Slc4a3	solute carrier family 4 (anion exchanger), member 3
XM_130233	1.68179	1.67018	Mnab	ring finger and CCCH-type zinc finger domains 2
NM_026212	-1.26576	-2.80889	Agpat2	1-acylglycerol-3-phosphate O-acyltransferase 2 (lysophosphatidic acid acyltransferase, beta)
NM_178890	1.61328	-1.30134	Abtb2	ankyrin repeat and BTB (POZ) domain containing 2
NM_001004468	-1.34257	1.06069	Tacc2	transforming, acidic coiled-coil containing protein 2
NM_009954	1	1.10191	Bcar1	breast cancer anti-estrogen resistance 1
NM_145070	1.02101	-3.22657	Hip1r	huntingtin interacting protein 1 related
NM_207659	-1.06437	1.46409	Hook3	hook homolog 3 (Drosophila)
NM_025861	-1.45397	-1.27456	Pqlc1	PQ loop repeat containing 1
NM_027106	1.07177	-1.11729	Avpi1	arginine vasopressin-induced 1
NM_181328	1.28343	1.26576	Slc25a29	solute carrier family 25 (mitochondrial carrier, palmitoylcarnitine transporter), member 29
NM_007801	1.08673	-1.02101	Ctsh	cathepsin H
NM_026148	1.02811	-1.72907	Lims1	LIM and senescent cell antigen-like domains 1
NM_145954	1.01396	-2.11404	Aldh16a1	aldehyde dehydrogenase 16 family, member A1
AK082665	1.00696	-1.46409	Rnf19	ring finger protein 19A
NM_011309	1.40444	-1.24833	S100a1	S100 calcium binding protein A1
NM_053082	2.90795	-1.23114	Tspan4	tetraspanin 4
NM_134034	1.10957	1.02101	AW011752	SMEK homolog 2, suppressor of mek1 (Dictyostelium)
NM_133755	-1.37554	-1.45397	Tubgcp2	tubulin, gamma complex associated protein 2
NM_145587	-1.41421	1.12506	Sbk1	SH3-binding kinase 1
NM_145989	1.03526	1.02101
XM_147798	1.70527	-1.8025
NM_011202	-1.07923	1.05702	Ptpn11	protein tyrosine phosphatase, non-receptor type 11
NM_013559	-1.91853	1.06437	Hsp110	heat shock 105kDa/110kDa protein 1
NM_145583	1.38511	-1.18099	Frag1	post-GPI attachment to proteins 2
AB23126	-1.77769	1.24833
NM_019663	2.07053	6.54322	Pias1	protein inhibitor of activated STAT 1
NM_026655	-1.6358	-1.47427	2310057M21Rik	RIKEN cDNA 2310057M21 gene
NM_021428	1.33793	-1.10957	Dexi	dexamethasone-induced transcript
NM_030698	1.3566	1.29235	Trim26	Tripartite motif protein 26
NM_030750	1.01396	1.04972	Sgpp1	sphingosine-1-phosphate phosphatase 1
NM_015828	-1.01396	1.13288	Gne	glucosamine
AB37059	-1.00696	-2.20381
NM_007585	1.45397	1.04247	Anxa2	similar to Annexin A2 (Annexin II) (Lipocortin II) (Calpactin I heavy chain) (Chromobindin-8) (p36) (Protein I) (Placental anticoagulant protein IV) (PAP-IV); annexin A2
NM_175456	-1.49485	-1.19748	Abra	actin-binding Rho activating protein
NM_010941	-1.29235	-1.1487	Nsdhl	NAD(P) dependent steroid dehydrogenase-like
NM_030210	-1.44393	-4.43828	Aacs	acetoacetyl-CoA synthetase
NM_145620	1.15669	1.01396	Rnu3ip2	RRP9, small subunit (SSU) processome component, homolog (yeast)
NM_175643	-1.55833	-1.38511	Adamts2	a disintegrin-like and metallopeptidase (reprolysin type) with thrombospondin type 1 motif, 2; similar to A disintegrin-like and metallopeptidase (reprolysin type) with thrombospondin type 1 motif, 2
NM_008907	-2.28153	-1.20581	Ppia	predicted gene 9234; peptidylprolyl isomerase A
NM_010117	4.25748	-1.02101	Rhbdf1	rhomboid family 1 (Drosophila)
NM_133807	-1.64718	-1.45397	Lrrc59	leucine rich repeat containing 59
NM_145500	1.22264	-1.22264	Ubtd1	ubiquitin domain containing 1
NM_153080	2.11404	1.39474	Tom1l2	target of myb1-like 2 (chicken)
XM_284175	-2.28153	1.11729	Flnc	Filamin C, gamma (actin binding protein 280)
NM_009121	-1.14076	-1.65864	Sat1	similar to spermidine/spermine N1-acetyltransferase; predicted gene 5552; spermidine/spermine N1-acetyl transferase 1
NM_009794	1.50525	-1.69349	Capn2	calpain 2
NM_025516	-1.59107	-1.31039	Ergic3	ERGIC and golgi 3
NM_007729	-1.21419	2.26577	Col11a1	collagen, type XI, alpha 1
NM_013759	1.51572	1.29235	Sepx1	selenoprotein X 1
NM_145584	1.02811	-1.95884	Spon1	spondin 1, (f-spondin) extracellular matrix protein
NM_175333	-1.18921	-1.38511	4933406J04Rik	solute carrier family 25, member 41
NC_001501	1.65864	1.52626
NM_010807	-1.58008	-1.16473	Bsdc1	MARCKS-like 1; predicted gene 9106
AF263743	-1.09429	1.32869	Erbb2ip	Erbb2 interacting protein
NM_011738	-1.25701	-2.08493	Ywhah	tyrosine 3-monooxygenase/tryptophan 5-monooxygenase activation protein, eta polypeptide
NM_017373	-1.37554	-1.70527	Nfil3	similar to NFIL3/E4BP4 transcription factor; nuclear factor, interleukin 3, regulated
NM_017380	3.55537	2.8481	(Sept9)	septin 9
NM_182990	1.41421	1.61328	Ssrp1	structure specific recognition protein 1
NM_010437	1.02811	-1.47427	Hivep2	human immunodeficiency virus type I enhancer binding protein 2
NM_009112	1.32869	1.49485	S100a10	S100 calcium binding protein A10 (calpactin)
NM_020033	-1.44393	1.07177	Ankrd2	ankyrin repeat domain 2 (stretch responsive muscle)
NM_025699	1.49485	1.23971	3230401D17Rik	RIKEN cDNA 3230401D17 gene
NM_145505	-1.09429	-1.50525	AI450540	family with sequence similarity 160, member B1; hypothetical protein LOC100044843
NM_013602	1.27456	-1.41421	Mt1	metallothionein 1
NM_052993	-1.37554	1.11729	C1galt1	core 1 synthase, glycoprotein-N-acetylgalactosamine 3-beta-galactosyltransferase, 1
NM_134150	1.91853	-1.53688	Otub1	similar to OTU domain, ubiquitin aldehyde binding 1; OTU domain, ubiquitin aldehyde binding 1
NM_008129	1.27456	1.38511	Gclm	glutamate-cysteine ligase, modifier subunit
NM_010468	1.59107	-1.18921	Hoxd3	homeo box D3
NM_013459	-1.04247	-2.08493	Cfd	complement factor D (adipsin)
NM_019791	-1.01396	-1.40444	Maged1	melanoma antigen, family D, 1
NM_022816	1.40444	-1.31039	Acot10	acyl-CoA thioesterase 10
XM_489200	-1.81504	-2.31338
AB12106	-1.27456	1.16473
XM_126866	1.14076	1.07923	C330002I19Rik	RIKEN cDNA C330002I19 gene
AK052775	2.04202	-1.16473	Rab11fip3	RAB11 family interacting protein 3 (class II)
NM_025272	1.01396	-1.85318	Atp6v0e	ATPase, H+ transporting, lysosomal V0 subunit E
NM_008161	-1.49485	-1.68179	Gpx3	glutathione peroxidase 3
NM_013808	-1.93187	-1.05702	Csrp3	cysteine and glycine-rich protein 3
NM_175127	-1.86607	-1.19748	Fbxo28	F-box protein 28
NM_178642	-1.07923	-1.10957	Tmem16a	anoctamin 1, calcium activated chloride channel
NM_010106	1.31951	-1.41421	Eef1a1	predicted gene 5869; predicted gene 7161; predicted gene 7105; predicted gene 5822; similar to eukaryotic translation elongation factor 1 alpha 1; predicted gene 6192; predicted gene 6392; predicted gene 6767; predicted gene 6170; predicted gene 6548; predicted gene 6789; eukaryotic translation elongation factor 1 alpha 1
NM_029787	-1.48452	-1.07923	Cyb5r3	cytochrome b5 reductase 3
NM_133826	1.79005	-1.11729	Atp6v1h	ATPase, H+ transporting, lysosomal V1 subunit H
NM_145519	-1.10191	-3.43426	Farp2	FERM, RhoGEF and pleckstrin domain protein 2
NM_172697	2.47942	1.89212	Prpf38a	PRP38 pre-mRNA processing factor 38 (yeast) domain containing A
NM_008693	1.21419	1.20581	Klk1	kallikrein 1-related peptidase b3
XM_485735	1.09429	1.15669	4921511K06Rik	coiled-coil domain containing 136
NM_009282	1.76541	1.18921	Ehd2	stromal antigen 1
NM_026908	1.75321	1.05702	Cab39l	calcium binding protein 39-like
NM_178367	1.01396	-1.19748	Dhx33	DEAH (Asp-Glu-Ala-His) box polypeptide 33
NM_181390	-3.11666	-2.58471	Mustn1	musculoskeletal, embryonic nuclear protein 1
AB16054	1	-2.47942
NM_178207	-1.04972	1.50525	Hist1h3a	histone cluster 1, H3i; histone cluster 1, H3h; histone cluster 1, H3g; predicted gene 12260; histone cluster 1, H3a
NM_180678	-1.25701	-1.18921	Gars	glycyl-tRNA synthetase
NM_025926	-1.22264	-1.03526	Dnajb4	DnaJ (Hsp40) homolog, subfamily B, member 4
XM_289885	-1.53688	-1.08673	Gstm7	Glutathione S-transferase, mu 7
NM_007459	2.05623	-1.37554	Ap2a2	hypothetical protein LOC100044229; adaptor protein complex AP-2, alpha 2 subunit
XM_129803	1.02811	1.04972
XM_130877	1.31951	-1.02101
NM_007484	-1.60214	-1.02811	Rhoc	ras homolog gene family, member C
NM_009667	-1.21419	1.07923	Ampd3	adenosine monophosphate deaminase 3
XM_109767	1.41421	1.40444	AI642036	Expressed sequence AI642036
NM_026637	1.32869	1.15669	A030007L17Rik	gamma-glutamyl cyclotransferase
NM_019563	1.94531	1.76541	Cited4	Cbp/p300-interacting transactivator, with Glu/Asp-rich carboxy-terminal domain, 4
NM_027439	1.53688	-1.29235	Atp6ap2	ATPase, H+ transporting, lysosomal accessory protein 2
NM_153396	1.02101	1.04972	Mical3	microtubule associated monoxygenase, calponin and LIM domain containing 3
NM_199056	1.26576	-2.20381	Ippk	inositol 1,3,4,5,6-pentakisphosphate 2-kinase
BC042895	-1.79005	-1.85318	Camk2d	calcium/calmodulin-dependent protein kinase II, delta
NM_008853	-1.10191	1.00696	Pja1	praja1, RING-H2 motif containing
NM_013749	-2.73208	-1.38511	Tnfrsf12a	tumor necrosis factor receptor superfamily, member 12a
NM_028024	1.19748	-1.36604	Nkiras2	NFKB inhibitor interacting Ras-like protein 2
NM_017372	-1.33793	-2.17347	Lyzs	lysozyme 2
XM_131399	-1.09429	-1.41421	Shb	Src homology 2 domain-containing transforming protein B
NM_207530	-1.13288	1.11729	Osbpl1a	oxysterol binding protein-like 1A
NM_011619	1.04247	-1.94531	Tnnt2	troponin T2, cardiac
NM_020268	1	-1.00696	Klk1b9	kallikrein 1-related peptidase b27
NM_026765	1.6245	1.65864	Uckl1	uridine-cytidine kinase 1-like 1
NM_144854	2	1.46409	ORF63	open reading frame 63
NM_013590	1.55833	-1.08673	Lzp-s	lysozyme 1
XM_489305	1.15669	-1.26576
AK076578	1.6245	-1.25701	Vps13a	vacuolar protein sorting 13A (yeast)
AB11044	1.02101	-1.18099
NM_020616	-1.18921	-1.04972	D930014E17Rik	RIKEN cDNA D930014E17 gene
NM_007570	1.07177	-1.04247	Btg2	B-cell translocation gene 2, anti-proliferative
NM_016809	1.17283	1.07923	Rbm3	predicted gene 15453; RNA binding motif protein 3
NM_019824	-1.23114	1.23971	Arpc3	actin related protein 2/3 complex, subunit 3
NM_011486	1.10957	1.18921	Stat3	similar to Stat3B; signal transducer and activator of transcription 3
NM_022018	2.8481	-2.09943	Niban	family with sequence similarity 129, member A
NM_010415	-1.76541	1.07177	Hbegf	heparin-binding EGF-like growth factor
AB23121	-1.93187	-1.69349
NM_007981	-1.45397	-1.28343	Acsl1	acyl-CoA synthetase long-chain family member 1
NM_033321	-1.32869	-1.56917	P2rx5	purinergic receptor P2X, ligand-gated ion channel, 5
BC065395	-1.07923	-1.52626	Cnih4	cornichon homolog 4 (Drosophila)
NM_009373	-1.30134	-1.10957	Tgm2	transglutaminase 2, C polypeptide
NM_144835	2.01391	-1.43396	Heatr1	HEAT repeat containing 1
AB16010	-1.19748	-1.29235
NM_008654	-1.16473	-1.16473	Myd116	protein phosphatase 1, regulatory (inhibitor) subunit 15A; myeloid differentiation primary response gene 116
NM_177133	-1.67018	-1.26576	Mgea5	Meningioma expressed antigen 5 (hyaluronidase)
AB14143	-1.28343	-1.10957
NM_011728	1.01396	-1.18921	Xpa	xeroderma pigmentosum, complementation group A
NM_144937	1.02101	-1.65864	Usp3	ubiquitin specific peptidase 3
NM_175198	1.02101	1.00696	1700058C01Rik	prospero homeobox 2
NM_026232	1.16473	-5.73582	Slc25a30	solute carrier family 25, member 30
J00479	-1.04972	-1.10191
NM_011779	1.23114	1.43396	Coro1c	coronin, actin binding protein 1C; predicted gene 5790
NM_010480	1.55833	-1.17283	Hsp90aa1	predicted gene 5511; heat shock protein 90, alpha (cytosolic), class A member 1
AB40119	1.38511	1.55833
NM_173385	-1.18099	-2.54912	Cilp	cartilage intermediate layer protein, nucleotide pyrophosphohydrolase
NM_001004143	1.33793	-1.54756	Usp22	ubiquitin specific peptidase 22
NM_008244	1.15669	-1.46409	Hgs	HGF-regulated tyrosine kinase substrate
NM_010944	1.05702	-5.38893	Musk	muscle, skeletal, receptor tyrosine kinase
NM_028956	-1.29235	1.6358	4933435A13Rik	pseudouridylate synthase 10
NM_173440	-1.47427	-1.71713	Nrip1	nuclear receptor interacting protein 1
NM_011868	1.30134	-1.05702	Peci	peroxisomal delta3, delta2-enoyl-Coenzyme A isomerase
NM_010275	-1.30134	1.03526	Gdnf	glial cell line derived neurotrophic factor
NM_025427	-1.21419	-1.16473	1190002H23Rik	RIKEN cDNA 1190002H23 gene
NM_013560	-1.6245	1.30134	Hspb1	heat shock protein 1
NM_019736	1.02811	-1.07923	Acot9	acyl-CoA thioesterase 9
NM_008631	5.54044	1.47427	Mt4	metallothionein 4
NM_175119	1.70527	1.10191
NM_010135	-2.01391	-1.02101	Enah	enabled homolog (Drosophila)
NM_181730	2.77022	-1.40444	Rpo1-3	polymerase (RNA) I polypeptide D; predicted gene 12751
NM_007913	1.21419	2.18859	Egr1	early growth response 1
NM_011724	-1.46409	-1.90528		xin actin-binding repeat containing 1
NM_008638	1.06437	-3.83706	Mthfd2	methylenetetrahydrofolate dehydrogenase (NAD+ dependent), methenyltetrahydrofolate cyclohydrolase
NM_031256	1.18099	-1.14076	Plekha3	pleckstrin homology domain-containing, family A (phosphoinositide binding specific) member 3
NM_175149	1.00696	-1.22264	2310022B05Rik	RIKEN cDNA 2310022B05 gene
NM_010220	3.20428	1.12506	Fkbp5	FK506 binding protein 5
NM_133220	1.02811	-1.19748		serum/glucocorticoid regulated kinase 3
NM_001002012	1.03526	-2.65737	Hspa2	heat shock protein 2
NM_139151	-1.00696	-15.7797	Spag4	sperm associated antigen 4
NM_015784	1.01396	-1.44393	Postn	periostin, osteoblast specific factor
NM_008630	-1.79005	-4.46915	Mt2	metallothionein 2
NM_026473	1.04247	-1.69349	Tubb6	tubulin, beta 6
XM_141283	-2.31338	2.8481
NM_009930	1.21419	1.20581	Col3a1	collagen, type III, alpha 1
XM_484178	-1.04972	-1.10957	Igh-1a	similar to gamma-2a immunoglobulin heavy chain; immunoglobulin heavy chain 1a (serum IgG2a); immunoglobulin heavy chain 1b (serum IgG2c)
NM_028724	1.68179	-1.31039	Rin2	similar to Ras and Rab interactor 2; Ras and Rab interactor 2
NM_198411	-1.18921	-1.87905	2610204M08Rik	subacute ozone induced inflammation; RIKEN cDNA 2610204M08 gene
NM_007446	-1.12506	-1.56917	Amy2	amylase 1, salivary
NM_172286	1.70527	-1.06437	6430548M08Rik	RIKEN cDNA 6430548M08 gene
NM_015764	-1.61328	-1.68179	Greb1	gene regulated by estrogen in breast cancer protein
XM_130015	-2.58471	-3.94493	Otud1	OTU domain containing 1
NM_133753	1.50525	-1.70527	Errfi1	ERBB receptor feedback inhibitor 1
NM_008963	1.05702	1.11729	Ptgds	prostaglandin D2 synthase (brain)
NM_008491	1.12506	1.27456	Lcn2	lipocalin 2
